# Supplementary material for: Ligand-free strategy for ultrafast and highly selective enrichment of glycopeptides using Ag-coated magnetic nanoarchitectures
Source: Royal Society of Chemistry journal article supplement (doi:10.1039/c2jm35196j), 2012-01-01
Supplement: c2jm35196j.pdf [file c2jm35196j.pdf]

## Supporting Information

### Ligand-Free Strategy for Ultrafast and Highly Selective Enrichment of Glycopeptides Using Ag-Coated Magnetic Nanoarchitectures

Wan-Fu Ma,<sup>1</sup> Lu-Lu Li,<sup>2</sup> Ying Zhang,<sup>2</sup> Qiao An,<sup>1</sup> Li-Jun You,<sup>1</sup> Ju-Mei Li,<sup>1</sup> Yu-Ting Zhang,<sup>1</sup>  
Shuai Xu,<sup>1</sup> Meng Yu,<sup>1</sup> Jia Guo,<sup>1</sup> Hao-Jie Lu<sup>2,\*</sup> and Chang-Chun Wang<sup>1,\*</sup>

<sup>1</sup>State Key Laboratory of Molecular Engineering of Polymers and Department of Macromolecular Science, Laboratory of Advanced Materials, Fudan University, Shanghai 200433, People's Republic of China

<sup>2</sup>Department of Chemistry and Institutes of Biomedical Sciences, Fudan University, Shanghai 200032, People's Republic of China.

\*Address correspondence to ccwang@fudan.edu.cn, luhaojie@fudan.edu.cn

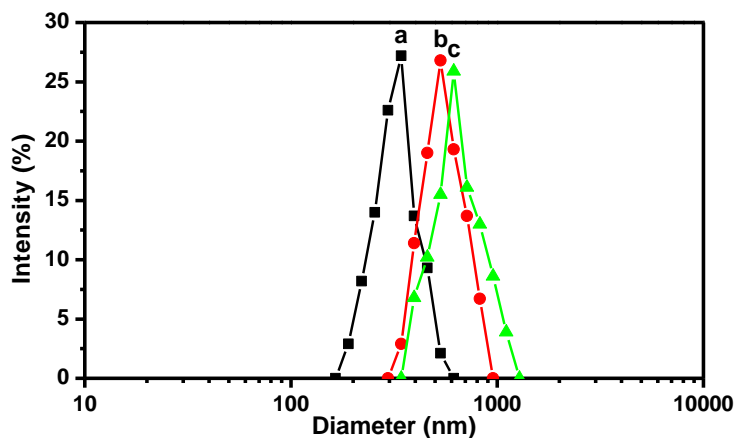

**Fig. S1** Hydrodynamic diameter distribution of (a) MCNCs, (b) MCNC@PMAA, and (c) MCNC@PMAA@Ag-NPs.

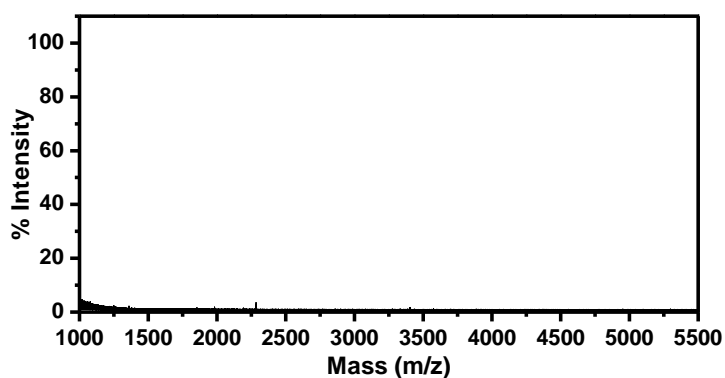

**Fig. S2** MALDI mass spectrum of the tryptic digest of HRP after enrichment by MCNC@PMAA.

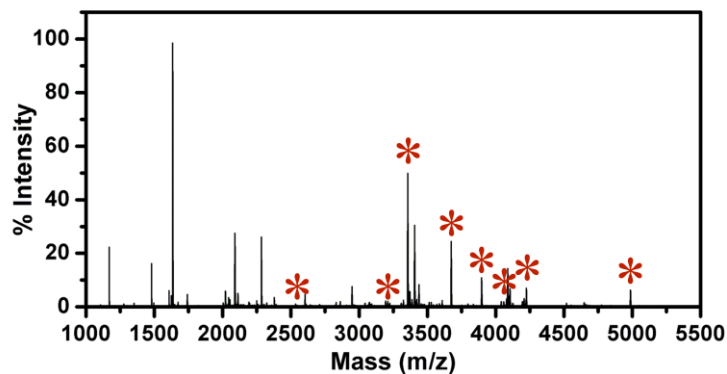

**Fig. S3** MALDI mass spectrum of the tryptic digest mixture of HRP and MYO (with a molar ratio of HRP to MYO of 1:100) after enrichment by MCNC@PMAA@Ag-NPs. (Glycopeptide peaks are labeled with “\*”).

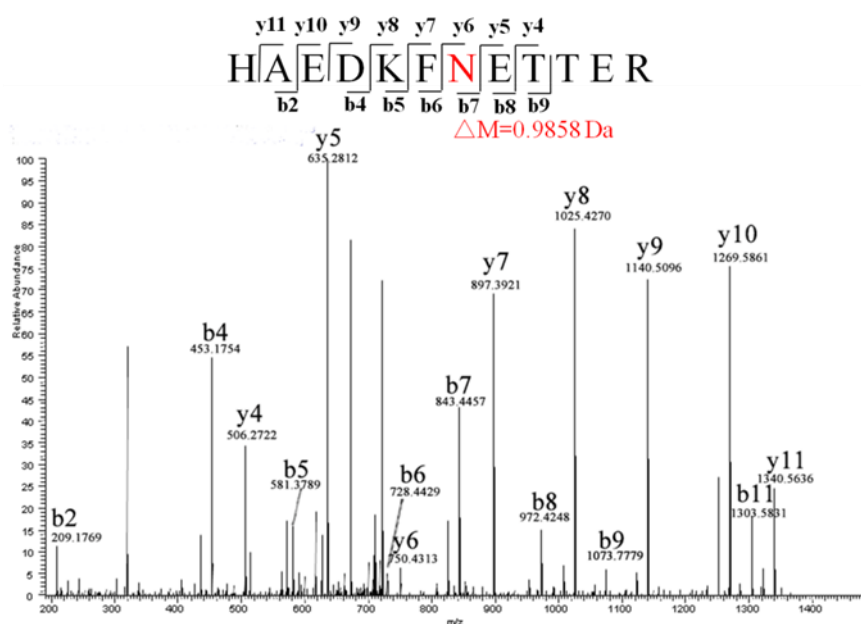

**Fig. S4** Representative MS/MS spectrum of the glycopeptide HAEDKFNETTER, N represents deamidated Asn with the mass increment of 0.9858 Da.

**Table S1.** Overview of observed glycopeptides derived from tryptic digests of HRP after enrichment with the composite microspheres. N# denotes the N-linked glycosylation site.

| <b>m/z</b>    | <b>glycan composition</b>                                                              | <b>amino acid sequence</b>                           |
|---------------|----------------------------------------------------------------------------------------|------------------------------------------------------|
| <b>2531.9</b> | FucGlcNAc <sub>1</sub>                                                                 | SFAN#STQTFNFVAFVEAMDR                                |
| <b>2850.4</b> | FucGlcNAc <sub>1</sub>                                                                 | GLIQSDQELFSSPN#ATDTIPLVR                             |
| <b>3207.4</b> | XylMan <sub>3</sub> GlcNAc <sub>2</sub>                                                | SFAN#STQTFNFVAFVEAMDR                                |
| <b>3353.4</b> | XylMan <sub>3</sub> FucGlcNAc <sub>2</sub>                                             | SFAN#STQTFNFVAFVEAMDR                                |
| <b>3526.4</b> | XylMan <sub>3</sub> GlcNAc <sub>2</sub>                                                | GLIQSDQELFSSPN#ATDTIPLVR                             |
| <b>3671.5</b> | XylMan <sub>3</sub> FucGlcNAc <sub>2</sub>                                             | GLIQSDQELFSSPN#ATDTIPLVR                             |
| <b>3893.4</b> | XylMan <sub>3</sub> FucGlcNAc <sub>2</sub>                                             | LHFHDCFVNGCDASILLDN#TTSFR                            |
| <b>4056.5</b> | XylMan <sub>3</sub> GlcNAc <sub>2</sub>                                                | QLTPTFYDNSC(AAVESACPR)PN#VS<br>NIVR-H <sub>2</sub> O |
| <b>4221.6</b> | XylMan <sub>3</sub> FucGlcNAc <sub>2</sub>                                             | QLTPTFYDNSC(AAVESACPR)PN#VS<br>NIVR                  |
| <b>4838.4</b> | XylMan <sub>3</sub> FucGlcNAc <sub>2</sub> ,XylMan <sub>3</sub> GlcNAc <sub>2</sub>    | LYN#FSNTGLPDPTLN#TTYLQTLR                            |
| <b>4983.0</b> | XylMan <sub>3</sub> FucGlcNAc <sub>2</sub> ,XylMan <sub>3</sub> FucGlcNAc <sub>2</sub> | LYN#FSNTGLPDPTLN#TTYLQTLR                            |

**Table S2.** The detailed information of the 127 unique glycopeptides mapped to 51 different glycoproteins.

| No. | Swissprot | Description                   | Peptide sequence                    | N position | Annotation |
|-----|-----------|-------------------------------|-------------------------------------|------------|------------|
| 1   | P01026    | Complement C3                 | GLSSDLWGEKPN#TSYIIGK                | 1617       | P          |
| 2   | P01048    | T-kininogen 1                 | EGN#CSVQSGLTWQDCDFK                 | 82         | p          |
|     |           |                               | IIYSIVQTN#CSK                       | 204        | p          |
|     |           |                               | EGN#CSVQSGLTWQDCDFKDAEEAATGECTTTLGK | 82         | p          |
|     |           |                               | HAVEHFNN#NTK                        | 168        | p          |
| 3   | P02764    | Alpha-1-acid glycoprotein     | EFQTDDQCVYN#FTHLGVQR                | 94         | p          |
|     |           |                               | LIN#DTIELR                          | 76         | n          |
|     |           |                               | PEPANITLGIPITN#ETLK                 | 34         | p          |
|     |           |                               | HGTFMLAFN#LTDENR                    | 134        | p          |
|     |           |                               | N#FTHLGVQR                          | 94         | p          |
| 4   | P04937    | Fibronectin                   | DQCIVDDITYNVN#DTFHK                 | 528        | p          |
|     |           |                               | LDAPTNLQFVN#ETDR                    | 1006       | p          |
| 5   | P05371    | Clusterin                     | QELN#DSLQVAER                       | 327        | Probable   |
|     |           |                               | QLEEFNL#QSSPF                       | 144        | Probable   |
|     |           |                               | AFPEVCN#ETMMALWEECKPCLK             | 102        | Probable   |
| 6   | P06866    | Haptoglobin                   | LLTTAQNLFN#HSEN#ATAK                | 148,152    | p          |
|     |           |                               | HGLTTGATLISDQWLLTTAQNLFN#HSEN#ATAK  | 152        | p          |
| 7   | P08649    | Complement C4                 | ALN#VTLSSMGR                        | 1323       | p          |
|     |           |                               | N#TTCQDLR                           | 1386       | p          |
| 8   | P08932    | T-kininogen 2                 | IIYSIVQTN#CSKEDFPFLR                | 204        | p          |
| 9   | P08934    | Kininogen-1                   | EGN#CSVQSGFAWQDCDFK                 | 82         | p          |
|     |           |                               | EALGHSIAQLNAENN#HTFYFK              | 294        | p          |
| 10  | P09006    | Serine protease inhibitor A3N | LEDLTPYVRDEELN#CTVVELK              | 258        | p          |
|     |           |                               | YTGN#ASALFILPDQGK                   | 269        | p          |
|     |           |                               | SMEEILEGLKFN#LTETPETEHR             | 104        | p          |
| 11  | P10959    | Liver carboxylesterase 1      | LDN#TSMSTVIDGVLPK                   | 302        | p          |
|     |           |                               | N#TTTYPPMCSQDGVVGK                  | 79         | p          |
|     |           |                               | NTQAVAQMIATLSGCN#N#TSSAAMVQCLR      | 274,275    | p          |
|     |           |                               | RFSPNLN#ISESVIPAIEK                 | 375        | p          |
| 12  | P10960    | Sulfated glycoprotein 1       | DN#ATEEEILHYLEK                     | 456        | p          |
|     |           |                               | TN#SSFVQGLVDHVK                     | 214        | p          |
|     |           |                               | TVVTEAGNLLKDN#ATEEEILHYLEK          | 80         | p          |
| 13  | P12346    | Serotransferrin               | FDEFFSQGCAPGYKKN#STLCDLCIGPAK       | 512        | p          |
|     | P13635    | Ceruloplasmin                 | ANEGAIYPDND#TTDFQR                  | 138        | p          |
|     |           |                               | DWEMELHHLQEQN#VSN AFLDKKEEFFIGSK    | 756        | p          |
| 14  | P14046    | Alpha-1-inhibitor 3           | DAGYTN#ATTTDQHGLAK                  | 393        | p          |
|     |           |                               | MHQAFHVN#ATVTEEGTGSEFSGSGR          | 321        | p          |
|     |           |                               | YLN#ETQQLTEK                        | 994        | p          |
|     |           |                               | ICLHLYHLN#ETVTVTASLISQR             | 55         | p          |
|     |           |                               | LDNNGCSTQEVN#ITEFQLK                | 301        | p          |
|     |           |                               | ALSCLESSWENIEQGGN#GSFVYTK           | 1143       | p          |
|     |           |                               | VPNAISVYDEIIN#VTACATYTYGK           | 247        | p          |
|     |           |                               | SLGNVN#FSVSAEAR                     | 872        | p          |
|     |           |                               | VPNAISVYDEIIN#VTACATYTYGKPVPGHVK    | 247        | p          |

|    |        |                                                                      |                                       |      |          |
|----|--------|----------------------------------------------------------------------|---------------------------------------|------|----------|
|    |        |                                                                      | TEVTTNNVLLYLDQVTN#QTLFSFIIQQDIPVK     | 1427 | p        |
|    |        |                                                                      | NYFPETWIWDLVTVN#SSGVTELEMTVPDTITIEWK  | 750  | p        |
| 15 | P14272 | Plasma kallikrein                                                    | LQTPLN#YTEFQKPICLPSK                  | 494  | probable |
|    |        |                                                                      | IYGGILN#LSEITNK                       | 453  | probable |
| 16 | P17475 | Alpha-1-antiproteinase                                               | QILEGLEFN#LTQIPEADIHK                 | 101  | p        |
|    |        |                                                                      | SSWVLMMDYLG#ATAIFLLPDDGK              | 265  | p        |
|    |        | Alpha-1-antiproteinase                                               | ELVHQS#TSNIFSPMSITTAFAMLSLGSK         | 64   | p        |
| 17 | P20059 | Hemopexin                                                            | SWPAVGN#CTAALR                        | 186  | p        |
|    |        |                                                                      | GEN#GTKPDSVDIEHCSDAWSFDATMDHN#GTMLFFK | 38   | p        |
| 18 | P20759 | Ig gamma-1 chain C region                                            | SWFVDDVEVHTAQTRPPEEQFN#STFR           | 176  | p        |
| 19 | P20762 | Ig gamma-2C chain C region                                           | VFTAQTPHEEQLN#GTFR                    | 179  | n        |
| 20 | P24090 | Alpha-2-HS-glycoprotein                                              | RPFGEVYELEIDTLETTCHALDPTPLAN#CSVR     | 99   | p        |
|    |        |                                                                      | TALAAFNAQNN#GTYFK                     | 176  | p        |
|    |        |                                                                      | FN#DTNVVHTVK                          | 156  | p        |
| 21 | P26644 | Beta-2-glycoprotein 1                                                | TGN#WSALPCK                           | 205  | p        |
|    |        | Beta-2-glycoprotein 1                                                | TSVGN#SSFYQDTPVFK                     | 114  | p        |
|    |        | Beta-2-glycoprotein 1                                                | CLPHFAMFGNDTVTCTAHGN#WTQLPECR         | 145  | p        |
|    |        | Beta-2-glycoprotein 1                                                | YTTFEYPNTIGFACNPGYYLN#GTSSSK          | 169  | p        |
| 22 | P31211 | Corticosteroid-binding globulin                                      | EEDFYVN#ETSTVK                        | 216  | p        |
|    |        | Corticosteroid-binding globulin                                      | AMLQLDEGNVLPN#STNGAPLHLR              | 352  | p        |
| 23 | P35859 | Insulin-like growth factor-binding protein complex acid labile chain | N#LTHLPDDIPVSTR                       | 64   | p        |
| 24 | P36953 | Afamin                                                               | HAEDKFN#ETTER                         | 402  | p        |
|    |        |                                                                      | CQAYKN#NSESFLNLY                      | 153  | p        |
|    |        |                                                                      | LPTKPQDQVDHFN#ATQK                    | 33   | p        |
| 25 | P51886 | Lumican                                                              | AFEN#VTDLQWLILDHNLLENSK               | 88   | p        |
| 26 | P55159 | Serum paraoxonase/arylesterase 1                                     | EVPVLDLPN#CTLVK                       | 41   | n        |
|    |        |                                                                      | VTVVYAEN#GTVLQGTVAAYVK                | 324  | p        |
| 27 | P55314 | Complement component C8 beta chain                                   | YEFALTEYESYDFEHN#VTEK                 | 242  | p        |
| 28 | Q03626 | Murinoglobulin-1                                                     | AQEAGYTN#ATTTDQHGLAK                  | 393  | p        |
|    |        |                                                                      | ALGCLEASWETIEQGRN#GSFVYTK             | 1153 | p        |
|    |        |                                                                      | VPNAISVYDEIIN#VTACAIY                 | 247  | p        |
|    |        |                                                                      | EEDSELDNNGCSTQEVN#ITEFQLK             | 301  | p        |
|    |        |                                                                      | SLGNVN#FVSVEAQSPCLCGSQVATVPETGRK      | 882  | p        |
|    |        |                                                                      | SACKEEDSELDNNGCSTQEVN#ITEFQLK         | 301  | p        |
|    |        |                                                                      | NYFPETWIWDLVTVN#SSGVTEVEMTVPDTITIEWK  | 760  | p        |
| 29 | Q62930 | Complement component C9                                              | VGVEVSPEKN#SSKPK                      | 261  | p        |
| 30 | Q62975 | Protein Z-dependent protease inhibitor                               | LPYQGN#ATMLVVLMEK                     | 287  | p        |
| 31 | Q63041 | Alpha-1-macroglobulin                                                | LTN#QTMGFSFAVEQDIPVK                  | 1448 | p        |
|    |        |                                                                      | N#LTVQVN#SVR                          | 382  | p        |
|    |        |                                                                      | SLGEVN#FTATAEALQSPCLCGNK              | 883  | p        |
|    |        |                                                                      | PVN#ETFPVVYIENPKR                     | 157  | p        |
|    |        |                                                                      | MVLFVPNIYVLEYLN#ETQQLTEAIK            | 1005 | p        |
|    |        |                                                                      | N#LTVQVNSVR                           | 382  | p        |
|    |        |                                                                      | VVSVDISFRPVN#ETFPVVYIENPK             | 157  | p        |
|    |        |                                                                      | CFANTVN#LSFPSAQLSPASDTHLTVK           | 568  | p        |
| 32 | Q63416 | Inter-alpha-trypsin inhibitor heavy chain H3                         | GDEKEN#ITAEALELSLK                    | 580  | p        |

|    |        |                                                         |                                |         |     |
|----|--------|---------------------------------------------------------|--------------------------------|---------|-----|
|    |        |                                                         | TAFITN#FTLTIDGVTPGSKV          | 91      | p   |
| 33 | Q63556 | Serine protease inhibitor A3M<br>(Fragment)             | FPDGTGLGN#DTLLHK               | 21      | n   |
|    |        |                                                         | YTGN#SSALFILPDK                | 262     | p   |
|    |        |                                                         | FN#LTESYETDIHQFGHLLQR          | 97      | p   |
| 34 | Q63621 | Interleukin-1 receptor accessory<br>protein             | PTLLN#DTGN#YTCMLR              | 117,118 | p   |
| 35 | Q64240 | Protein AMBP                                            | EDSCQLN#YSEGPCLMQK             | 233     | p   |
| 36 | Q6P734 | Plasma protease C1 inhibitor                            | DTYVN#ASLSLYGSSPR              | 243     | p   |
|    |        |                                                         | VGQLQLSHN#LSFVIMVPQSPHQLEDMEK  | 356     | p   |
| 37 | Q7TMA5 | Apolipoprotein B-100                                    | DLEMVN#ISLAR                   | 2662    | p   |
|    |        |                                                         | LPQQIHDYLN#ASDWER              | 2094    | p   |
|    |        |                                                         | LSTIDNIYIPAMGN#FTYDFSFK        | 3299    | p   |
|    |        |                                                         | ALN#LTMLPK                     | 3715    | p   |
| 38 | Q8R2H5 | Phosphatidylinositol-glycan-specific<br>phospholipase D | LSSSPN#ITISCK                  | 502     | p   |
|    |        |                                                         | VN#GTLTQVLLVGAPTHDDVSK         | 661     | p   |
|    |        |                                                         | N#LTMFISK                      | 308     | p   |
| 39 | Q99J86 | Attractin                                               | VFHIHN#ESWVLLTPK               | 431     | p   |
|    |        |                                                         | IDSTGN#VTNELR                  | 419     | p   |
| 40 | Q9EQV9 | Carboxypeptidase B2                                     | EVHFFVN#ASDVNSVK               | 72      | p   |
|    |        |                                                         | IPFNVLMMNVEDLIQQQTSN#DTVSPR    | 107     | p   |
| 41 | Q9JJS8 | Mannan-binding lectin serine<br>protease 2              | APGN#DTFYSLGPSLK               | 103     | Ref |
|    |        |                                                         | GDSGGALVFLDN#ETQR              | 641     | p   |
| 42 | Q9QX79 | Fetuin-B                                                | VLYLPAYN#CTLRPVSK              | 139     | p   |
| 43 | Q9WUW3 | Complement factor I                                     | FN#VSLIYGSTDTEGIVQVK           | 116     | p   |
|    |        |                                                         | IN#STECLHVR                    | 182     | p   |
|    |        |                                                         | WGEVDLIGN#CSR                  | 515     | p   |
|    |        |                                                         | FSNN#GTCTAEK                   | 106     | p   |
|    |        |                                                         | DVNN#VTYVWGVISWGENCGKPEFPGVYTR | 557     | p   |
| 44 | P05545 | Serine protease inhibitor A3K                           | FN#LTEITEEEIHQFGHLLQR          | 102     | p   |
|    |        |                                                         | KFINDYVSN#QTQGK                | 182     | p   |
|    |        |                                                         | VPFNPN#DTFESEFYLDEK            | 220     | p   |
| 45 | P05544 | Serine protease inhibitor A3L                           | LINDYVSN#QTQGK                 | 182     | p   |
| 46 | Q6IE52 | Murine globulin-2                                       | YLN#ETQQLTENIK                 | 968     | p   |
| 47 | P18292 | Prothrombin                                             | ITDNMFCAQFVN#DTK               | 552     | p   |
| 48 | Q5FVF9 | Biotinidase                                             | GAHIIVFPEDGIHGFN#FTR           | 97      | n   |
| 49 | P20761 | Ig gamma-2B chain C region                              | EEQYN#STFR                     | 183     | n   |
| 50 | Q63514 | C4b-binding protein alpha chain                         | CGPPDLPYALPASEMN#QTDIESHTTLR   | 31      | p   |
| 51 | Q6IRK9 | Plasma glutamate carboxypeptidase                       | EVMSLLQPLN#ITK                 | 396     | p   |
